1  
2  
3  
4  
5  
6  
7  
8  
9  
10  
11  
12  
13  
14  
15  
16  
17  
18  
19  
20  
21  
22  
23

Touch-induced Mechanical Strain in Somatosensory Neurons is Independent of Extracellular  
Matrix Mutations in *C. elegans*

Adam L. Nekimken<sup>1,2,†</sup>, Beth L. Pruitt<sup>1,2,†,\*</sup>, and Miriam B. Goodman<sup>1,2,\*</sup>

<sup>1</sup>Stanford University Department of Mechanical Engineering

<sup>2</sup>Stanford University Department of Molecular and Cellular Physiology

<sup>†</sup>Current address: Fullmoon Sensors, Inc. (ALN) and University of California-Santa Barbara  
Department of Mechanical Engineering (BLP)

\*Corresponding authors: [blp@ucsb.edu](mailto:blp@ucsb.edu) (BLP) and [mbgoodmn@stanford.edu](mailto:mbgoodmn@stanford.edu) (MBG)

Running Head: Mechanical strain in sensory neurons

Abbreviations:

TRN: touch receptor neuron

ECM: extracellular matrix

24 **Abstract**

25           Cutaneous mechanosensory neurons are activated by mechanical loads applied to the  
26 skin, and these stimuli are proposed to generate mechanical strain within sensory neurons. Using  
27 a microfluidic device to deliver controlled stimuli to intact animals and large, immobile, and  
28 fluorescent protein-tagged mitochondria as fiducial markers in the touch receptor neurons  
29 (TRNs), we visualized and measured touch-induced mechanical strain in *C. elegans* worms. At  
30 steady-state, touch stimuli sufficient to activate TRNs induce an average strain of 3.1% at the  
31 center of the actuator and this strain decays to near zero at the edges of the actuator. We also  
32 measured strain in animals carrying mutations affecting links between the extracellular matrix  
33 (ECM) and the TRNs but could not detect any differences in touch-induced mechanical strain  
34 between wild-type and mutant animals. Collectively, these results demonstrate that touching the  
35 skin induces local mechanical strain in intact animals and suggest that a fully intact ECM is not  
36 essential for transmitting mechanical strain from the skin to cutaneous mechanosensory neurons.  
37

## 38 Introduction

39 Touch and proprioception are essential to the daily lives of all animals, including  
40 humans. Classical examples of mechanotransduction, both of these senses depend on activation  
41 of mechano-electrical transduction (MeT) channels arrayed within somatosensory neurons (Katta  
42 et al., 2015) and are thought to activate following physical deformation of sensory cells during  
43 touch and movement. Consistent with this inference, neurons innervating stretch receptor organs  
44 in vertebrates (Bewick and Banks, 2015) and arthropods (Suslak and Jarman, 2015) are activated  
45 by experimentally applied mechanical strain (stretch). High-speed volumetric imaging reveals  
46 that proprioceptors deform in crawling *Drosophila* larvae (He et al., 2019; Vaadia et al., 2019)  
47 and that physical deformations are correlated with calcium transients. Similarly, movement  
48 induces localized calcium transients in the tertiary dendrites of the *C. elegans* PVD  
49 proprioceptors that depend on expression of a DEG/ENaC/ASIC protein (Tao et al., 2019). These  
50 studies reinforce the idea that physical deformation of sensory neurons during movement is  
51 critical for activation of native MeT channels, but do not address whether or not similar  
52 deformations occur in response to touch or measure the extent of mechanical strain that occurs  
53 within the sensory neurons themselves.

54 Using *C. elegans* touch receptor neurons (TRNs), we investigated the quantitative  
55 relationship between touch and physical deformation of sensory neurons in intact living animals.  
56 The ready availability of transgenic animals expressing TRN-specific markers and their  
57 transparent body make *C. elegans* an especially useful animal for investigating touch-evoked  
58 sensory neuron deformation. Adult animals have six TRNs, consisting of two bilaterally  
59 symmetric pairs of touch receptor neurons (ALM and PLM) and two neurons that run along the  
60 ventral midline (AVM and PVM) (Goodman, 2006). These six neurons extend long, unusually  
61 straight sensory neurites (Krieg et al., 2017) that are embedded in epidermal cells and have a  
62 distinctive, electron-dense extracellular matrix or ECM as well as hemidesmosome structures  
63 attaching the TRNs to the cuticle (Chalfie and Sulston, 1981; Chalfie and Thomson, 1979).

64 All of the TRNs express the MEC-4 channel, which is required for touch-evoked calcium  
65 transients (Suzuki et al., 2003) and touch-evoked MeT currents (O'Hagan et al., 2005). The  
66 MEC-4 channels localize to puncta arrayed along the entire length of wild-type TRN sensory

67 neurites (Chelur et al., 2002; Cueva et al., 2007; Emtage et al., 2004; Katta et al., 2019), but are  
68 disrupted in ECM mutants (Emtage et al., 2004).

69 Touch-evoked behavior (Petzold et al., 2013) and MeT channel activation (Eastwood et  
70 al., 2015) depend on body indentation rather than the force applied. Slow stimuli fail to activate  
71 MeT currents and their size increases with stimulus frequency, indicating that activation of MeT  
72 channels in their native environment depends on tissue viscoelasticity (Eastwood et al., 2015;  
73 Katta et al., 2019; Sanzeni et al., 2019). Although slow, movement-induced physical  
74 deformations of the worm's body and its neurons are too slow to activate MeT currents in the  
75 TRNs (Eastwood et al., 2015; Katta et al., 2019), these undulatory movements produce  
76 mechanical strains of up to 40% (Krieg et al., 2017; Krieg et al., 2014), indicating that TRNs can  
77 withstand significant mesoscale extension and compression *in situ*. The ability to withstand  
78 movement-induced strain is shared by mammalian nerves that experience up to 30% strain  
79 during limb movement (Phillips et al., 2004).

80 Here, we sought to determine whether or not body indentations sufficient to evoke  
81 calcium transients in TRNs also generate local strain. To achieve this goal, we visualized steady-  
82 state, touch-induced strain in TRNs in living animals restrained within a microfluidic stimulation  
83 device equipped with the ability to deliver mechanical stimuli (Fehlauer et al., 2018; Nekimken  
84 et al., 2017a). Our approach benefits from large, immobile mitochondria distributed within TRN  
85 sensory neurites (Sure et al., 2018), exploits the ability to tag these mitochondria with a red  
86 fluorescent protein (Zheng et al., 2014), and borrows analytic principles from traction force  
87 microscopy (Ribeiro et al., 2016). Although mitochondria have been used to evaluate neuronal  
88 mechanics in culture (O'Toole et al., 2015), we believe this study is the first to make use of  
89 mitochondria as mechanical fiducial markers in living animals. We show that body indentation  
90 increases local steady-state mechanical strain in the TRNs in a manner that is robust to mutations  
91 known to affect attachment of the TRN to the extracellular matrix and to epidermal cells.

## 92 **Results**

### 93 *Mechanical stimulation in a microfluidic device*

94 To directly observe touch-induced deformation of the TRNs, we sought to develop a  
95 method that combines the delivery of controlled mechanical stimuli and three-dimensional  
96 optical imaging. To reach this goal, we applied mechanical stimuli to adult worms confined in a  
97 microfluidic device (Nekimken *et al.*, 2017, Figure 1A). Our device has pneumatic actuators that  
98 consist of a thin flexible wall that separates a channel filled with air from a worm in the trap  
99 channel. When air pressure in the actuator channel is increased using a pressure controller, the  
100 thin wall expands like a balloon, deforming the trapped worm and generating indentations  
101 sufficient to activate the TRNs (Nekimken *et al.*, 2017a). Other devices that deliver mechanical  
102 stimuli to restrained (Cho *et al.*, 2018) or moving (McClanahan *et al.*, 2017) worms in  
103 microfluidic chambers have been reported, but they use larger actuator channels and are thus not  
104 well-matched to our goal of investigating local deformation of the TRNs.

105 Our device is designed to increase the probability that animals will enter the trap with  
106 either their left or right sides in contact with the bottom of the chamber and their ventral and  
107 dorsal sides near the actuator (Nekimken *et al.*, 2017a). Consistent with this expectation and the  
108 position of the AVM and ALM neurons within the worm's body, previous experiments using this  
109 device resulted in a higher frequency of AVM activation compared to ALM (Nekimken *et al.*,  
110 2017a). However, the rotational orientation of each worm was variable. We took advantage of  
111 this variation to select animals oriented such that ALM (rather than AVM) was near the actuator  
112 and used only ALM neurons for this study. In all cases, this variation in worm positioning leads  
113 to variation in the size of the effective stimulus. To ensure that all animals received a deforming  
114 stimulus, we limited our analysis to animals whose TRNs were deformed enough to observe  
115 visually during the experiment.

116

### 117 *Mitochondria as fiducial markers for inferring strain*

118 We used fluorescent protein-tagged mitochondria as fiducial markers to measure strain,  
119 an approach that uses particle tracking with large (~1  $\mu\text{m}$ ), immobile mitochondria in the TRNs  
120 (Sure *et al.*, 2018) serving as natural fiducial markers. We imaged mitochondria position before

121 and after mechanical stimulation (Figures 1B and 1C). Next, we used the displacement between  
122 adjacent mitochondria to quantify one-dimensional mechanical strain along the long axis of the  
123 TRN (Figure 1D) according to:  $\epsilon = \Delta L/L_0$ , where  $L_0$  is the resting, undeformed length of an  
124 object, and  $\Delta L$  is the change in length of the object when deformed. For clarity, we refer to this  
125 as longitudinal strain. As shown in Figure 1, mitochondria adjacent to the actuator moved more  
126 than those anterior and posterior to the actuator (Figures 1B and 1C) and the inferred strain was  
127 greatest near the center of the actuator (Figure 1D). This method enables direct observation of  
128 touch-evoked strain in *C. elegans* TRNs in a single dimension aligned with the TRN's longest  
129 dimension.

130 We note that this method is not suitable for detecting shear strain or bending strain. To  
131 derive these measurements, we would need to detect angular changes (shear) or relative position  
132 (bending) of the mitochondria within the TRNs. Given that the diameter of each mitochondrion  
133 is only ~100 nm and the TRN diameter is not much larger than this (200-300 nm, see Figure  
134 3C, Cueva et al., 2007), such movements cannot be resolved because these objects are similar in  
135 size to the estimated lateral resolution of 254 nm and axial resolution of 632 nm of our imaging  
136 system. What about strain in directions orthogonal to the long axis of the TRN dendrite?  
137 Although our image stacks contain three-dimensional position data (Figures 2A and 2B), the  
138 initial distance between adjacent pairs of mitochondria in the  $x$  and  $z$  directions is small  
139 compared to the resulting displacement. Thus, measurement resolutions lead to large  
140 uncertainties in the strain calculation for these dimensions. Both limitations can be attributed to  
141 the confinement of the mitochondria within the narrow caliber of the TRN and the fact that the  
142 TRNs lie primarily within a single focal plane. Thus, the size of mitochondria, the geometry of  
143 the TRNs and the optical resolution of the spinning-disk confocal limit this measurement to one-  
144 dimensional strain along the  $y$ -dimension that traces the main axis of the TRN.

145  
146 *Local indentation induces local mechanical strain in TRNs*

147 Next, we estimated the spatially averaged distribution of touch-induced strain in the  
148 TRN. The mitochondria are sparsely distributed in the TRN and strain is a pairwise measurement  
149 between adjacent mitochondria, so our strain measurements result in a series of discontinuous  
150 step functions for a single trial rather than a smooth curve (Figure 1D). Each segment of the plot

151 indicates the average strain between two markers, so the maximum local strain on each interval  
152 may be larger than our measured strain. The average distance between mitochondria in control  
153 *jsIs1073* animals was 26  $\mu\text{m}$  (min: 5  $\mu\text{m}$ ; max: 64  $\mu\text{m}$ ) and we were able to analyze an average  
154 of 8.9 intervals per trial (Table S1). To obtain averages across trials, we plotted deformation  
155 against position in the longitudinal or  $y$  direction, fit this profile with a Gaussian function and  
156 defined the position of the maximum as the center of the actuator and  $y=0$ . (see dotted line in  
157 Figure 1C). In this coordinate system, positions anterior to  $y=0$  are negative and positions  
158 posterior to  $y=0$  are positive. Finally, we determined the average strain at each longitudinal  
159 position along the neurite across actuation trials (see Figure 2C). Note that the average strain is  
160 both larger and noisier for anterior (negative) positions. This is likely to reflect the fact that the  
161 head is less constrained in the microfluidic channel than other parts of the body and suggests that  
162 displacement and strain on the anterior side of the actuator include both touch- and movement-  
163 induced mechanical strain on the neuron.

164 As expected, strain at the center of the actuator ( $y=0$ ) increases with TRN deformation  
165 (Figure 2D), but the dependence on TRN deformation was weak. The observed, but modest  
166 variation in TRN deformation arises from two aspects of our method. First, because the actuator  
167 is fixed to the surrounding material of the device on all sides, its center is the location of  
168 maximum deformation. Second, although most animals are trapped with either their left or right  
169 side in contact with the coverslip at the bottom of the device, some are rotated along their  
170 anterior-posterior axis such that the position of the imaged TRN varies with respect to the  
171 actuator (Figure 2A). Thus, the average strain induced between the pair of mitochondria at the  
172 center of the actuator was  $0.031 \pm 0.005$  (mean  $\pm$  SEM,  $n = 61$  trials,  $N=15$  animals) in transgenic  
173 *jsIs1073* TRN neurons. Although additional studies exploring a wider range of deformations will  
174 be needed to determine the nature relationship between TRN deformation and strain, to our  
175 knowledge, these are the first *in vivo* measurements of touch-induced longitudinal strain in touch  
176 receptor neurons, and they link local body indentation to local cellular deformation.

177

178 *Do tagged mitochondria affect TRN function?*

179 We used classical touch assays to address this question (Chalfie et al., 2014; Nekimken et  
180 al., 2017b) by measuring touch sensitivity in wild-type (N2) and transgenic worms carrying the

181 transgenic mitochondria marker, *jsIs1073*. In blinded assays of three independent cohorts of 25  
182 animals for each genotype, wild-type and *jsIs1073* animals had touch response rates of 0.869 and  
183 0.865, respectively. The difference between the means was 0.00667 [95% CI (-0.0347, 0.048)].  
184 Thus, the *jsIs1073* transgene does not decrease touch sensitivity.

185

### 186 *Selected ECM mutants and their touch sensation and anatomical phenotypes*

187 Having measured touch-induced mechanical strain in control TRNs, next we measured  
188 longitudinal strain in four existing ECM mutants: *him-4(e1267)*, *mec-1(e1738)*, *mec-1(e1066)*,  
189 and *mec-5(u440)*. One of these mutants, *him-4(e1267)*, has a partial defect in touch-sensitivity,  
190 and the others are touch-insensitive (Du et al., 1996; Emtage et al., 2004; Vogel and Hedgecock,  
191 2001). We reproduced these previous results using a ten-touch assay (Table 1). Whereas *him-4*  
192 mutants retain MEC-4 puncta that are grossly wild-type, TRN neurites in *mec-1* and *mec-5*  
193 mutants lack prominent MEC-4 puncta (Emtage et al., 2004). In *him-4* and in *mec-1(e1738)*  
194 mutants analyzed here, the ALM and PLM neurons are displaced from their normal body  
195 position near the lateral midlines and are not properly embedded in the epidermis (Emtage et al.,  
196 2004; Vogel and Hedgecock, 2001). This effect is inferred to arise from a defective TRN-ECM  
197 attachment (Vogel and Hedgecock, 2001). Consistent with this idea, the electron-dense ECM is  
198 not detected in *mec-1* mutants (Chalfie and Sulston, 1981). Analyzing these four mutants enables  
199 us to evaluate the relationship, if any, between touch-induced longitudinal strain and three other  
200 phenotypes: behavioral responses to touch, the distribution of MEC-4 puncta, and TRN-ECM  
201 attachment.

202 The *him-4* gene encodes hemicentin, a conserved ECM protein that is rich in Ig and EGF  
203 domains and is expressed by body wall muscles (Vogel and Hedgecock, 2001). The *him-4* locus  
204 is >30 kb, which complicated determination of the molecular defect encoded by *e1267* using  
205 classical sequencing methods. We used whole-genome sequencing to circumvent this limitation  
206 and found that *e1267* encodes a single base indel in the third intron of the *him-4* gene,  
207 introducing a shift in the reading frame of the encoded protein (Figure S1). A second  
208 polymorphism was detected in the intron following the 48th exon. Thus, the *e1267* allele is a null  
209 allele and animals carrying this mutant are likely to lack the HIM-4 protein. The *mec-1* gene  
210 encodes a large secreted protein rich in kunitz-like domains, is expressed by the TRNs, and many



211 alleles of this gene were found in forward genetic screens for touch-insensitive animals (Chalfie  
212 and Au, 1989; Chalfie and Sulston, 1981). The *e1066* allele is a null and animals carrying this  
213 allele are likely to lack the MEC-1 protein, whereas the *e1738* allele encodes a premature stop  
214 codon and is proposed to express a truncated MEC-1 protein. Both *mec-1* mutants are touch  
215 insensitive, but only *e1066* lacks proper TRN-ECM attachments (Emtage et al., 2004). *mec-5*  
216 encodes an atypical collagen and, unlike *mec-1*, it is not made by the TRNs (Du et al., 1996).  
217 Like other ECM mutants we analyzed here, the *u440* allele is null and *u440* mutants do not  
218 express the MEC-5 protein. The TRN neurites in *mec-5* mutants are positioned near the lateral  
219 midlines, but are less straight than they are in wild-type animals, meandering such that some  
220 segments of the neurite are close to the muscle and other parts closer to the lateral midline  
221 (Emtage et al., 2004).

222

### 223 *Touch-induced longitudinal strain in TRNs with ECM mutants*

224 To analyze transmission of mechanical energy from the skin in animals lacking proper  
225 TRN-ECM attachment, we introduced the *jsIs1073* transgene into *him-4* and *mec-1* mutants and  
226 applied mechanical stimuli to animals trapped in our pneumatic microfluidic device. Touch-  
227 induced longitudinal mechanical strain in *him-4(e1267)* TRNs was indistinguishable from that  
228 observed in control animals (Figure 3A, Table 2). Touch-induced longitudinal strain was  
229 likewise similar to control in both *mec-1* mutants (Figure 3B) and in *mec-5* mutants (Figure 3C).  
230 Figure 3D shows that the average longitudinal strain profiles for control, *him-4*, *mec-1*, and  
231 *mec-5* mutants are similar across the entire 200  $\mu\text{m}$  segment of the TRN neurite analyzed here.  
232 Values for strain measured at the actuator center ( $y=0$ ) had similar mean values and distribution  
233 for all genotypes tested (Figure 4A) and estimation graphics (Ho et al., 2019) indicate that the  
234 mean values for all genotypes are not different than control values (Figure 4B). Except for *mec-5*  
235 mutants, the number of mitochondria available for tracking and the average distance between  
236 mitochondria was similar in control transgenic and mutant animals (Table S1). *mec-5* mutants  
237 had fewer, more widely spaced mitochondria than control animals, an effect would be expected  
238 to impair the spatial resolution of longitudinal strain measurements. Collectively, these findings  
239 suggest that neither severe nor mild defects in TRN-ECM attachment play a significant role in  
240 the generation of touch-induced longitudinal mechanical strain at steady-state. Future studies

241 and techniques will be needed to resolve dynamic changes in local strain that are expected to  
242 occur on the millisecond timescale of MEC-4-dependent MeT channel activation.

243

## 244 **Discussion**

245 Using mitochondria as natural fiducial markers in *C. elegans* TRNs, we showed for the  
246 first time that body indentation sufficient to activate the TRN causes an increase in longitudinal  
247 strain. The magnitude of this strain increases with TRN displacement. In wild-type animals, the  
248 touch-induced strain closest to the point of maximum indentation was roughly 3% (Figure 3,  
249 Table 2). This change in strain is unlikely to damage these sensory neurons, since they are  
250 subjected to mechanical strain on the order of 40% during locomotion (Krieg et al., 2017; Krieg  
251 et al., 2014). Such global changes in strain are too slow to activate the TRNs (Eastwood et al.,  
252 2015; Katta et al., 2019).

253 The 3% strain we measured may be a lower bound on the true value for longitudinal  
254 strain. Simulations predicted an elongated strain field with a peak value of 12% for longitudinal  
255 strain (Sanzeni et al., 2019). Unlike our measurements, which used a wide (50 $\mu$ m), flexible  
256 PDMS membrane to indent the worm's body and have limited spatial resolution, the simulations  
257 employed a stiff spherical bead (10 $\mu$ m diameter) to deliver touch stimuli and a continuous  
258 deformation function. The simulations (Sanzeni et al., 2019) predict strains are present in the  
259 other two dimensions (along the direction of the stimulus and tangential to the circumference of  
260 the worm at the point of the stimulus). Due to the nature of our measurement, however, we were  
261 only able to measure one-dimensional strain along the length of the TRN. Nevertheless, these  
262 measurements of touch-induced strain can be incorporated into future models of *C. elegans* touch  
263 sensation to improve understanding of the mechanical state of the TRN and mechano-sensitive  
264 ion channel complex upon touch stimulation.

265

### 266 *Origins of mechanical coupling between the skin surface and somatosensory neurons*

267 We tested the idea that strain transmission would depend on TRN-ECM attachment, be  
268 correlated with impaired touch sensation, and be independent of the proper distribution of  
269 MEC-4 channels. To our surprise, we found that touch-induced longitudinal mechanical strain

270 was similar in control TRNs and all ECM mutants tested here, including the *him-4(e1267)* and  
271 *mec-1(e1066)* mutants exhibiting severe defects in TRN-ECM attachments. Thus, touch-induced  
272 longitudinal strain we observed in the ALM neurons is independent of their attachment to other  
273 tissues or the expression of ECM proteins MEC-1 and MEC-5, at least at steady state.

274 This finding implies that mechanical coupling between the skin and sensory neurons  
275 persists in mutants with ECM defects. Friction is one alternative source of mechanical coupling  
276 between TRNs and surrounding tissues. In this scenario, all of the worm's tissues are compacted  
277 together by a high hydrostatic pressure and this would elevate friction between tissues. Further  
278 compression applied to the outside of the worm during touch stimulation could lead to stiffening  
279 of the worm's body that might be caused by internal structures jamming together (Gilpin et al.,  
280 2015). When we and others immobilize worms in microfluidic devices, we fabricate channels  
281 small enough to apply gentle compressive forces that the worm cannot overcome. As a result, the  
282 worm is compressed on all sides except the nose and tail when in the microfluidic trap,  
283 potentially jamming the TRNs against surrounding tissues and further increasing friction.  
284 Another possibility is that the generation of touch-induced local mechanical strain is dominated  
285 by the cytoskeleton. In support of this idea, mutations that disrupt the expression of MEC-12  $\alpha$ -  
286 tubulin and MEC-7  $\beta$ -tubulin decrease mechanoreceptor currents and increase stimulus  
287 amplitude needed to activate these currents (Bounoutas et al., 2009; O'Hagan, 2005). Additional  
288 experimental work and methods with improved spatial and temporal resolution will be needed to  
289 differentiate among these possibilities.

290

### 291 *Spatial and temporal resolution of mechanical strain transmission*

292 The spatial resolution of our strain measurements is limited by the average distance  
293 between adjacent, immobile mitochondria, which was 26 $\mu$ m (Table S1). Thus, this method may  
294 lack sufficient spatial resolution to detect micro- or nanoscale variations in mechanical strain  
295 transmission at steady state. The spatial resolution of strain measurements could be improved by  
296 using more closely spaced fiducial markers. In principle, MEC-4 channels (with an average  
297 spacing of 2-3  $\mu$ m) tagged with a very bright fluorescent protein would provide a ten-fold  
298 increase in resolution. Independent of potential improvements in spatial resolution, the present  
299 approach is limited to steady-state measurements because our volume imaging rate is low (15

300 seconds per stack). In this regard, it is important to note that wild-type *C. elegans* TRNs are  
301 preferentially activated mostly by high-velocity stimuli (Eastwood et al., 2015; Katta et al., 2019;  
302 Nekimken et al., 2017a; Suzuki et al., 2003). Temporal resolution could be improved using other  
303 imaging techniques enabling rapid acquisition of imaging volumes. If volumes could be acquired  
304 at 20 Hz or faster, it would possible to observe mechanical strain in a 10 Hz buzz stimulus that  
305 we previously used to activate the TRNs (Nekimken et al., 2017a).

### 306 *Conclusion*

307 We performed the first *in vivo* measurements of touch-induced mechanical strain in *C.*  
308 *elegans* TRNs. We used mechanically stable mitochondria in the TRNs as natural fiducial  
309 markers to observe deformation of the TRN and found that local touch stimuli applied in a  
310 microfluidic device induces local strain in the TRN. Defects in the ECM surrounding the TRN  
311 did not alter the steady-state mechanical strain in the TRN, suggesting that explicit attachments  
312 are not necessary for deformation of the TRN and that the bulk properties of tissues are sufficient  
313 to sustain significant mechanical energy transfer from the skin surface to the embedded neurons.  
314 In light of the temporal limitations of our measurements, however, we cannot exclude the  
315 possibility that TRN-ECM attachments contribute to dynamic aspects of mechanical strain  
316 transmission. Collectively, these findings provide an empirical basis for the idea that mechanical  
317 stimuli applied to the skin stretch embedded sensory neurons that may be shared by the sensory  
318 neurons that innervate the skin and other tissue in mammals.  
319

## 320 **Methods and Materials**

321

### 322 *Nematode strains*

323 For all experiments measuring mechanical strain, we used animals carrying *jsIs1073*  
324 [*mec-7p::TagRFP-mito::CBunc-119*], a transgene that drives expression of TagRFP in the  
325 mitochondria in the TRNs (Zheng et al., 2014), alone or together with ECM mutants (Table 3).  
326 We relied on visualization of the *jsIs1073* transgene and behavioral phenotypes (for *mec* genes)  
327 or anatomical defects (for *him-4*) to perform genetic crosses. We used gene sequencing to verify  
328 the presence of ECM mutants in all strains created for this study. The primer pairs we used to  
329 amplify the relevant segments of each gene are:

330 *mec-1(e1066)*: Forward—catcttcacgcccgaagtc, Reverse—aatcctctctgccctcatgttc

331 *mec-1(e1738)*: Forward—tcacagtcagacgtgcctcg, Reverse—cattgcctcacaccaacttcac

332 *mec-5(u444)*: Forward—cagaatactatgtacgtaacttgggatc; Reverse—ctcatgggtacgcaaatgatactc

333 *him-4(e1267)*: Forward—ttcgtgatgactggtgactgtgg; Reverse—ttaaagtcaacagcaccgtgacc

334

### 335 *Immobilization and mechanical stimulation with a pneumatic microfluidics device*

336 To provide a repeatable mechanical stimulus that is compatible with imaging the mitochondria of  
337 the TRN, we used a microfluidic device made of the transparent elastomer PDMS for  
338 simultaneous mechanical stimulation and imaging of *C. elegans* (Nekimken et al., 2017a). Using  
339 a pressure controller (Elveflow OB1), we applied 300 kPa of pressure to one of the device's  
340 actuators to create a mechanical stimulus. We fabricated and operated devices designed for use  
341 with young adult worms as described in our previous work (Fehlauer et al., 2018; Nekimken et  
342 al., 2017a). Because worms immobilized in this trap are uniformly and partially deformed by the  
343 channel, we refer to this as the rest configuration.

344

### 345 *Sample preparation and inclusion criteria*

346 We performed all experiments using young adult animals that were synchronized by  
347 hypochlorite treatment (Stiernagle, 2006) and cultured for three days on NGM agar plates seeded  
348 with OP50 bacteria for food. We transferred animals from the agar plates with a platinum wire

349 pick to a drop of imaging medium (see below) in a small Petri dish. After using the pick to push  
350 away large particles that might clog the microfluidic device, we aspirated worms into  
351 polyethylene tubing (PE50, Intramedic™ brand, Becton-Dickson) with a syringe and connected  
352 the tubing to the device's inlet. For each trial, we pushed a worm into the trap channel using the  
353 syringe and then evaluated whether to use this worm for an experiment based on our inclusion  
354 criteria. We included animals that fit in the microfluidic trap with minimal movement and could  
355 be ejected through the narrow opening at the head of the trap. When performing experiments  
356 with *him-4* mutants, we chose animals whose gross morphology was wild-type and avoided  
357 animals whose intestines were everted. In all cases, we only acquired images from animals  
358 whose ALM neurons were oriented adjacent to the mechanical actuation channels.

359 To improve image quality by reducing reflections generated by the walls of the  
360 microfluidic trap, we designed a non-toxic imaging medium with a refractive index similar to  
361 PDMS (1.4). The imaging medium was a 70%:30% (vol:vol) mixture of physiological saline  
362 and iodixanol (Optiprep™, Sigma-Aldrich), a non-toxic density-gradient medium (Boothe et al.,  
363 2017). We used the same physiological saline as that used for electrophysiological recordings  
364 from *C. elegans* neurons (O'Hagan et al., 2005), which contains (in mM): NaCl (145), KCl (5),  
365 MgCl<sub>2</sub> (5), CaCl<sub>2</sub> (1), and Na-HEPES (10), adjusted to a pH of 7.2 with NaOH. The imaging  
366 medium has an osmolality of 300-325 mOsm (Fiske Micro-Osmometer Model 210), so it does  
367 not cause large osmotic shocks to *C. elegans*. By contrast with other fluids we tested (e.g.  
368 glycerol, halocarbon oil), this medium has a viscosity that appeared to be similar to that of  
369 physiological saline.

370

### 371 *Image acquisition*

372 Although the mechanical stimulus is mostly in the horizontal direction, there is enough  
373 deformation in the z-direction to move the neuron out of plane during stimulation in some cases.  
374 In initial experiments with a traditional epifluorescence microscope, the mitochondria often  
375 moved out of focus during stimulation due to movement in the z-direction. To account for this  
376 problem, we used a spinning disk confocal microscope (Nikon TiE, Yokogawa CSU-X1,  
377 40x/NA 1.4 oil objective, and Photometrics Prime95B sCMOS camera) to acquire z-stacks,  
378 which provided adequate resolution in the z-direction.

379 For each trial, we acquired eleven (11) z-stacks containing the neuron of interest, with  
380 300 kPa of pressure applied during the even-numbered stacks, and 0 kPa applied during the odd-  
381 numbered stacks. We started acquisition of a stack every 15 seconds, although the time to  
382 acquire each given stack was approximately 12 seconds. The exact time varied depending on the  
383 height of the z-stack, which was manually set to accommodate observed motion in the z direction  
384 during the test actuation. During the short delay between acquisition of stacks, we toggled the  
385 applied pressure.

386

### 387 *Image analysis*

388 To detect the mitochondria, we used a particle-tracking algorithm implemented in Python  
389 (Allan et al., 2018), based on work by Crocker and Grier (Crocker and Grier, 1996). Briefly, the  
390 algorithm involves applying a spatial band pass filter, finding peaks, refining the position of  
391 peaks by finding their center of mass, and linking particles across timepoints into trajectories. In  
392 some stacks, the algorithm failed to detect the mitochondria because they were too close to the  
393 top or bottom of the stack, were not bright enough, overlapped with the mitochondria of another  
394 TRN, or were blurred due to the motion of the worm. We discarded all stacks subsequent to a  
395 stack where the image processing failed, because the strain measurement requires comparison to  
396 a previous stack. Additionally, not all of the stacks from each trial were usable, since the  
397 fluorophores bleached over time. As a result, not all actuation events yielded strain  
398 measurements (see Supplementary Figure S2).

399 Due to variability across trials, we manually selected a region of interest around the TRN  
400 and tuned parameters in the particle tracking algorithm. Primarily, we changed the minmass  
401 threshold, which filters out particles where the sum of pixel values within the boundaries of the  
402 particle is below the chosen threshold, and the search radius for the linking step, which specifies  
403 how far a particle can travel between timepoints and still be identified as the same particle. Less  
404 frequently, we changed the cutoff size for the bandpass filter or the brightness percentile  
405 threshold, which sets a minimum value for the brightest pixel in a particle as a percentile of the  
406 brightness of pixels in the image. We tuned these parameters until the particles found and linked  
407 included only particles along the location of the neuron and not autofluorescent spots.  
408 Supplemental Figure S3 shows the range of parameters we used.



409

410 *Touch assays*

411 To test the touch-sensitivity of the mutants used in our strain transmission experiments,  
412 we performed touch assays by lightly stroking an eyebrow hair across the body of a worm and  
413 scoring its behavioral response (Goodman, 2006). For each session of touch assays, we tested 25  
414 worms from a plate, performing 10 touches per worm. We performed the touch assays blinded  
415 with respect to genotype. For each touch event, we counted a response consisting of reversing  
416 direction or speeding up to move away from the stimulus as a positive response.

417

418 *Whole-genome sequencing of him-4(e1267)*

419 Our whole-genome sequencing protocol involved four sub-protocols: 1) DNA extraction, 2)  
420 sequencing library preparation, 3) sequencing, and 4) analysis. We isolated DNA from CB1267  
421 *him-4(e1267)* X animals with a phenol chloroform isoamyl alcohol (PCI) extraction. First, we  
422 washed worms off a mostly starved plate using M9 buffer, rinsed the animals twice in M9 buffer,  
423 resuspended them in EN buffer (0.1M NaCl and 20 mM EDTA), removed the supernatant, and  
424 flash-froze the sample in liquid nitrogen. Next, we added 450  $\mu$ L of worm lysis buffer (0.1 M  
425 TRIS pH 8.5, 0.1 M NaCl, 50 mM EDTA, and 1% SDS) and 40  $\mu$ L of proteinase K (10 mg/ml)  
426 to 50  $\mu$ L of frozen worms and incubated at 62°C for 45 minutes, vortexing occasionally. Then,  
427 we performed the PCI extraction in a phase lock gel tube (VWR) by adding 500  $\mu$ L of PCI to the  
428 sample, vortexing, spinning for 5 minutes at 10,000 rpm, and then collecting the upper phase.  
429 We repeated the PCI extraction step, and then extracted twice using chloroform. We precipitated  
430 the DNA by adding 40  $\mu$ L of 5M sodium acetate and 1 mL of ethanol, spinning for 5 minutes at  
431 10,000 rpm, removing the supernatant, washing in 70% ethanol, and resuspending in 50  $\mu$ L of  
432 TE buffer at pH 7.4.

433 We created a sequencing library according to manufacturer instructions (Nextera DNA  
434 Library Prep Kit, Illumina). Briefly, this includes tagmentation of the DNA using the Illumina  
435 Tagment DNA Buffer and Enzyme, clean-up of the tagmented DNA using a Zymo DNA Clean  
436 and Concentrator Kit, PCR to add the library indices to the tagmented DNA, and PCR cleanup  
437 by gel extraction using a Qiagen MinElute Kit. We did a quality control step to confirm that the  
438 average length of DNA fragments was in the expected range of 300-500 bp using the Agilent



439 Bioanalyzer at the Stanford Protein and Nucleic Acid Biotechnology Facility. Sequencing was  
440 completed on an Illumina NextSeq sequencer in the Stanford Functional Genomics Facility.

441 We analyzed the sequencing data using the computing cluster of the Stanford Center for  
442 Genomics and Personalized Medicine. Briefly, we mapped reads using Bowtie2, used Picard to  
443 sort reads, mark duplicates, and prepare read groups, then used GATK to select high quality  
444 SNPs and INDELs, and SnpEff to annotate the results.

445

#### 446 *Code availability*

447 Two kinds of data were analyzed using custom code: image analysis (Python,  
448 [https://github.com/anekimken/SSN\\_ImageAnalysis](https://github.com/anekimken/SSN_ImageAnalysis)) and whole-genome sequence analysis  
449 available (scripts, [https://github.com/wormsenseLab/whole\\_genome\\_sequencing](https://github.com/wormsenseLab/whole_genome_sequencing)).

450

#### 451 **Acknowledgments**

452 We thank Chloe Girard, Chantal Akerib, Melissa Pickett, and Anne Villeneuve for the gift of  
453 their training and assistance in whole genome sequencing; Michael Nonet for NM3573, the strain  
454 with labeled mitochondria in the TRNs; Ehsan Rezeai for help with software testing; Michael  
455 Lin for the loan of a spinning disk confocal for pilot experiments. Some of the experiments were  
456 performed at Stanford core facilities, including the Cell Sciences Imaging Facility, Functional  
457 Genomics Facility (funded in part by a Shared Instrumentation Grant, NIH S10OD018220), the  
458 Genetics Bioinformatics Service Center, and the nano@Stanford labs (supported by the National  
459 Science Foundation as part of the National Nanotechnology Coordinated Infrastructure under  
460 award ECCS-1542152). This work was funded by an NIH fellowship to ALN (F31NS100318)  
461 and grant to MBG (R35NS105092).

462

463 **References**

- 464 Allan, D.B., Caswell, T., Keim, N.C., van der Wel, C.M., 2018. trackpy: Trackpy v0.4.1.  
465 doi:10.5281/ZENODO.1226458
- 466 Bewick, G.S., Banks, R.W., 2015. Mechanotransduction in the muscle spindle. *Pflügers Arch. -*  
467 *Eur. J. Physiol.* 467, 175–190.
- 468 Boothe, T., Hilbert, L., Heide, M., Berninger, L., Huttner, W.B., Zaburdaev, V., Vastenhouw,  
469 N.L., Myers, E.W., Drechsel, D.N., Rink, J.C., 2017. A tunable refractive index matching  
470 medium for live imaging cells, tissues and model organisms. *Elife* 6.  
471 doi:10.7554/eLife.27240
- 472 Bounoutas, A., O’Hagan, R., Chalfie, M., 2009. The Multipurpose 15-Protofilament  
473 Microtubules in *C. elegans* Have Specific Roles in Mechanosensation, *Current Biology*.  
474 doi:10.1016/j.cub.2009.06.036
- 475 Chalfie, M., Au, M., 1989. Genetic control of differentiation of the *Caenorhabditis elegans* touch  
476 receptor neurons. *Science* (80- ). 243, 1027–1033.
- 477 Chalfie, M., Hart, A.C., Rankin, C.H., Goodman, M.B., 2014. Assaying mechanosensation.  
478 *WormBook*.
- 479 Chalfie, M., Sulston, J., 1981. Developmental genetics of the mechanosensory neurons of  
480 *Caenorhabditis elegans*. *Dev. Biol.* 82, 358–370. doi:10.1016/0012-1606(81)90459-0
- 481 Chalfie, M., Thomson, J.N., 1979. Organization of neuronal microtubules in the nematode  
482 *Caenorhabditis elegans*. *J. Cell Biol.* 82, 278–289.
- 483 Chelur, D.S., Ernstrom, G.G., Goodman, M.B., Yao, C.A., Chen, L., O Hagan, R., Chalfie, M.,  
484 O’Hagan, R., Chalfie, M., 2002. The mechanosensory protein MEC-6 is a subunit of the *C.*  
485 *elegans* touch-cell degenerin channel. *Nature* 420, 669–673. doi:10.1038/nature01205
- 486 Cho, Y., Oakland, D.N., Lee, S.A., Schafer, W.R., Lu, H., 2018. On-chip functional  
487 neuroimaging with mechanical stimulation in: *Caenorhabditis elegans* larvae for studying  
488 development and neural circuits. *Lab Chip* 18, 601–609. doi:10.1039/c7lc01201b
- 489 Crocker, J.C., Grier, D.G., 1996. *Methods of Digital Video Microscopy for Colloidal Studies*. J.

- 490 Colloid Interface Sci. 179, 298–310. doi:10.1006/jcis.1996.0217
- 491 Cueva, J.G., Mulholland, A., Goodman, M.B., 2007. Nanoscale Organization of the MEC-4  
492 DEG/ENaC Sensory Mechanotransduction Channel in *Caenorhabditis elegans* Touch  
493 Receptor Neurons. *J. Neurosci.* 27, 14089–14098.
- 494 Du, H., Gu, G., William, C.M., Chalfie, M., 1996. Extracellular proteins needed for *C. elegans*  
495 mechanosensation. *Neuron* 16, 183–194.
- 496 Eastwood, A.L., Sanzeni, A., Petzold, B.C., Park, S.-J., Vergassola, M., Pruitt, B.L., Goodman,  
497 M.B., 2015. Tissue mechanics govern the rapidly adapting and symmetrical response to  
498 touch. *Proc. Natl. Acad. Sci.* 112, E6955–E6963. doi:10.1073/pnas.1514138112
- 499 Emtage, L., Gu, G., Hartweg, E., Chalfie, M., 2004. Extracellular proteins organize the  
500 mechanosensory channel complex in *C. elegans* touch receptor neurons. *Neuron* 44, 795–  
501 807.
- 502 Fehlaue, H., Nekimken, A.L.A.L., Kim, A.A.A.A., Pruitt, B.L.B.L., Goodman, M.B.M.B.,  
503 Krieg, M., 2018. Using a microfluidics device for mechanical stimulation and high  
504 resolution imaging of *C. Elegans*. *J. Vis. Exp.* 2018. doi:10.3791/56530
- 505 Gilpin, W., Uppaluri, S., Brangwynne, C.P., 2015. Worms under Pressure: Bulk Mechanical  
506 Properties of *C. elegans* Are Independent of the Cuticle. *Biophys. J.* 108, 1887–1898.
- 507 Goodman, M., 2006. Mechanosensation. *WormBook*. doi:10.1895/wormbook.1.62.1
- 508 He, L., Gulyanov, S., Mihovilovic Skanata, M., Karagoyozov, D., Heckscher, E.S., Krieg, M.,  
509 Tsechpenakis, G., Gershow, M., Tracey, W.D., 2019. Direction Selectivity in *Drosophila*  
510 Proprioceptors Requires the Mechanosensory Channel Tmc. *Curr. Biol.* 29, 945-956.e3.  
511 doi:10.1016/j.cub.2019.02.025
- 512 Ho, J., Tumkaya, T., Aryal, S., Choi, H., Claridge-Chang, A., 2019. Moving beyond P values:  
513 data analysis with estimation graphics. *Nat. Methods*. doi:10.1038/s41592-019-0470-3
- 514 Katta, S., Krieg, M., Goodman, M.B., 2015. Feeling Force: Physical and Physiological Principles  
515 Enabling Sensory Mechanotransduction, in: *Annual Review of Cell and Developmental*  
516 *Biology*. doi:10.1146/annurev-cellbio-100913-013426

- 517 Katta, S., Sanzeni, A., Das, A., Vergassola, M., Goodman, M.B., 2019. Progressive recruitment  
518 of distal MEC-4 channels determines touch response strength in *C. elegans*. *J. Gen. Physiol.*  
519 doi:10.1085/jgp.201912374
- 520 Krieg, M., Dunn, A.R., Goodman, M.B., 2014. Mechanical control of the sense of touch by  $\beta$ -  
521 spectrin. *Nat. Cell Biol.* 16. doi:10.1038/ncb2915
- 522 Krieg, Michael, Dunn, A.R., Goodman, M.B., 2014. Mechanical control of the sense of touch by  
523  $\beta$ -spectrin. *Nat. Cell Biol.* 16, 224–233.
- 524 Krieg, M., Stühmer, J., Cueva, J.G., Fetter, R., Spilker, K., Cremers, D., Shen, K., Dunn, A.R.,  
525 Goodman, M.B., 2017. Genetic defects in  $\beta$ -spectrin and tau sensitize *C. Elegans* axons to  
526 movement-induced damage via torque-tension coupling. *Elife* 6. doi:10.7554/eLife.20172
- 527 McClanahan, P.D., Xu, J.H., Fang-Yen, C., 2017. Comparing *Caenorhabditis elegans* gentle and  
528 harsh touch response behavior using a multiplexed hydraulic microfluidic device. *Integr.*  
529 *Biol.* doi:10.1039/C7IB00120G
- 530 Nekimken, A.L., Fehlauer, H., Kim, A.A., Manosalvas-Kjono, S.N., Ladpli, P., Memon, F.,  
531 Gopisetty, D., Sanchez, V., Goodman, M.B., Pruitt, B.L., Krieg, M., 2017a. Pneumatic  
532 stimulation of *C. elegans* mechanoreceptor neurons in a microfluidic trap 17, 1116–1127.
- 533 Nekimken, A.L., Mazzochette, E.A., Goodman, M.B., Pruitt, B.L., 2017b. Forces applied during  
534 classical touch assays for *Caenorhabditis elegans*. *PLoS One* 12.  
535 doi:10.1371/journal.pone.0178080
- 536 O’Hagan, R., 2005. Components of a Mechanotransduction Complex in *C. elegans* Touch  
537 Receptor Neurons: An in vivo Electrophysiology Study. Columbia University.
- 538 O’Hagan, R., Chalfie, M., Goodman, M.B., 2005. The MEC-4 DEG/ENaC channel of  
539 *Caenorhabditis elegans* touch receptor neurons transduces mechanical signals. *Nat.*  
540 *Neurosci.* 8, 43–50. doi:10.1038/nn1362
- 541 O’Toole, M., Lamoureux, P., Miller, K.E., 2015. Measurement of subcellular force generation in  
542 neurons. *Biophys. J.* 108, 1027–1037. doi:10.1016/j.bpj.2015.01.021
- 543 Petzold, B.C., Park, S.-J., Mazzochette, E.A., Goodman, M.B., Pruitt, B.L., 2013. MEMS-based

- 544 force-clamp analysis of the role of body stiffness in *C. elegans* touch sensation. *Integr. Biol.*  
545 (Camb). 5, 853–864. doi:10.1039/c3ib20293c
- 546 Phillips, J.B., Smit, X., Zoysa, N. De, Afoke, A., Brown, R.A., 2004. Peripheral nerves in the rat  
547 exhibit localized heterogeneity of tensile properties during limb movement. *J. Physiol.* 557,  
548 879–887. doi:10.1113/jphysiol.2004.061804
- 549 Ribeiro, A.J.S., Denisin, A.K., Wilson, R.E., Pruitt, B.L., 2016. For whom the cells pull:  
550 Hydrogel and micropost devices for measuring traction forces. *Methods* 94, 51–64.  
551 doi:10.1016/j.ymeth.2015.08.005
- 552 Sanzeni, A., Katta, S., Petzold, B., Pruitt, B.L., Goodman, M.B., Vergassola, M., 2019.  
553 Somatosensory neurons integrate the geometry of skin deformation and  
554 mechanotransduction channels to shape touch sensing. *Elife* 8, 1–44.  
555 doi:10.7554/eLife.43226
- 556 Stiernagle, T., 2006. Maintenance of *C. elegans*. *WormBook*. doi:10.1895/wormbook.1.101.1
- 557 Sure, G.R., Chatterjee, A., Mishra, N., Sabharwal, V., Devireddy, S., Awasthi, A., Mohan, S.,  
558 Koushika, S.P., 2018. UNC-16/JIP3 and UNC-76/FEZ1 limit the density of mitochondria in  
559 *C. elegans* neurons by maintaining the balance of anterograde and retrograde mitochondrial  
560 transport. *Sci. Rep.* 8, 8938. doi:10.1038/s41598-018-27211-9
- 561 Suslak, T.J., Jarman, A.P., 2015. Stretching the imagination beyond muscle spindles - stretch-  
562 sensitive mechanisms in arthropods. *J. Anat.* 227, 237–242. doi:10.1111/joa.12329
- 563 Suzuki, H., Kerr, R., Bianchi, L., Frøkjær-Jensen, C., Slone, D., Xue, J., Gerstbrein, B., Driscoll,  
564 M., Schafer, W.R., 2003. In vivo imaging of *C. elegans* mechanosensory neurons  
565 demonstrates a specific role for the MEC-4 channel in the process of gentle touch sensation.  
566 *Neuron* 39, 1005–1017.
- 567 Tao, L., Porto, D., Li, Z., Fechner, S., Lee, S.A., Goodman, M.B., Xu, X.Z.S., Lu, H., Shen, K.,  
568 2019. Parallel Processing of Two Mechanosensory Modalities by a Single Neuron in *C.*  
569 *elegans*. *Dev. Cell* 51, 617-631.e3. doi:10.1016/j.devcel.2019.10.008
- 570 Vaadia, R.D., Li, W., Voleti, V., Singhanian, A., Hillman, E.M.C., Grueber, W.B., 2019.  
571 Characterization of Proprioceptive System Dynamics in Behaving *Drosophila* Larvae Using

572 High-Speed Volumetric Microscopy. *Curr. Biol.* 29, 935-944.e4.

573 doi:10.1016/j.cub.2019.01.060

574 Vogel, B.E., Hedgecock, E.M., 2001. Hemicentin, a conserved extracellular member of the  
575 immunoglobulin superfamily, organizes epithelial and other cell attachments into oriented  
576 line-shaped junctions. *Development* 128, 883–894.

577 Zheng, Q., Ahlawat, S., Schaefer, A., Mahoney, T., Koushika, S.P., Nonet, M.L., 2014. The  
578 Vesicle Protein SAM-4 Regulates the Processivity of Synaptic Vesicle Transport. *PLoS*  
579 *Genet.* 10, e1004644. doi:10.1371/journal.pgen.1004644

580

581

582 **Figure Legends**

583

584 **Figure 1: Touch-induced mechanical strain measured using mitochondria as fiducial**  
585 **markers in *C. elegans* TRNs *in vivo*.**

586 A) Brightfield image of worm in the microfluidic device. Scale bar 20  $\mu\text{m}$ . B) Maximum  
587 projection image of TRN mitochondria before (magenta) and during (green) mechanical  
588 stimulus. Mitochondria that did not move appreciably appear white due to the overlap of  
589 magenta and green. Image intensity and contrast was adjusted to improve visualization. Scale bar  
590 20  $\mu\text{m}$ . C) Displacement in the direction of actuation before (magenta) and during (green)  
591 stimulation. The smooth line (green) is a Gaussian fit used to infer the center of actuator. D)  
592 Distribution of touch-induced strain in the TRN for a single actuation trial.  
593

594 **Figure 2: Indentation induces local longitudinal strain in *C. elegans* TRNs.**

595 A) Three-dimensional diagram the positioning of the worm in the microfluidics trap, the animal-  
596 centric coordinate system used to characterize strain, and the consequences of trapping animals  
597 in different orientations. TRN is red, and muscles are included in brown as visual aid. B) Touch-  
598 induced displacement in three dimensions. C) Touch-induced strain, anterior is to the left and  
599 posterior is to the right.  $y=0$  is the center of the actuator.  $n=61$  trials from  $N=15$  worms. D)  
600 Mechanical strain at  $y=0$  as a function of maximum neuron displacement. The line is a linear fit  
601 to the data:  $\varepsilon = 0.0061x - 0.0067$ , where  $\varepsilon$  is the strain and  $x$  is the maximum displacement. The  
602 shaded area indicates 95% confidence intervals of the fit.  $R^2 = 0.04$ .

603

604

605

606



607 **Figure 3: Touch-induced mechanical strain profiles are similar in control animals and**  
608 **ECM mutants.**

609 A) Spatially averaged strain in control ALM neurons with normal TRN attachment (15 animals)  
610 and *him-4(e1267)* with attachment defects (16 animals). The data for control animals are the  
611 same data as Figure 2. B) Spatially averaged strain in *mec-1* mutants. 14 independent animals for  
612 *mec-1(1066)* and 16 animals for *mec-1(e1738)*. C) Spatially averaged strain in *mec-5(u444)*  
613 mutants (17 animals). D) Overlay of all spatially averaged strain profiles. Smooth lines are the  
614 averages across all trials and shaded areas show the error (95% confidence intervals). One ALM  
615 neuron tested in each animal.  
616

617 **Figure 4: Strain at the center of the actuator is similar in control animals and ECM**  
618 **mutants**

619 A) Strain at the center of the actuator. Each point is the result of a single trial. The vertical lines  
620 next to the swarm plots indicate the median and quartiles of the data. Data collected from 15, 16,  
621 14, 16, and 17 animals (left to right). B) Difference in the mean strain between control and each  
622 mutant with a bootstrapped resampled distribution of the data. Estimation plots generated using  
623 the DABEST plotting package (Ho et al., 2019).

624

625 **Table 1: Touch sensitivity of ECM mutants.**

626

| Genotype            | Response probability | Mean difference from control | 95% confidence interval of mean difference |
|---------------------|----------------------|------------------------------|--------------------------------------------|
| control             | 0.742                |                              |                                            |
| <i>him-4(e1267)</i> | 0.527                | -0.215                       | (-0.275, -0.163)                           |
| <i>mec-1(e1066)</i> | 0.083                | -0.659                       | (-0.698, -0.619)                           |
| <i>mec-1(e1738)</i> | 0.237                | -0.505                       | (-0.551, -0.461)                           |
| <i>mec-5(u444)</i>  | 0.208                | -0.534                       | (-0.580, -0.487)                           |

627 All mutants we tested were less sensitive to touch than control animals; effect size was smallest  
628 for *him-4(e1267)* and largest for *mec-1(e1066)*. All strains tested contained the transgene  
629 *jsIs1073* that tags mitochondria in the TRNs with RFP. *N*=100 worms for each genotype, tested  
630 in four independent cohorts of 25 blinded to genotype.

631

632

633

634 **Table 2: Touch-evoked longitudinal strain in the TRNs as a function of genotype.**

635

| Genotype            | Mean strain $\pm$ SEM | Mean difference from control | 95% confidence interval of mean difference | stimulation trials | animals |
|---------------------|-----------------------|------------------------------|--------------------------------------------|--------------------|---------|
| control             | 0.031 $\pm$ 0.005     |                              |                                            | 61                 | 15      |
| <i>him-4(e1267)</i> | 0.024 $\pm$ 0.005     | -0.007                       | (-0.020, 0.007)                            | 61                 | 16      |
| <i>mec-1(e1066)</i> | 0.034 $\pm$ 0.007     | 0.003                        | (-0.012 0.022)                             | 49                 | 14      |
| <i>mec-1(e1738)</i> | 0.035 $\pm$ 0.005     | 0.004                        | (-0.009 0.018)                             | 68                 | 16      |
| <i>mec-5(u444)</i>  | 0.026 $\pm$ 0.009     | -0.005                       | (-0.028 0.013)                             | 44                 | 17      |

636 There was no detectable difference in the magnitude of the touch-evoked strain in control and

637 ECM mutant animals.

638

639 **Table 3: *C. elegans* strains**

640

| <b>Strain Name</b> | <b>Genotype</b>              | <b>Source</b>        |
|--------------------|------------------------------|----------------------|
| N2 (Bristol)       | wild-type                    | CGC                  |
| NM3573             | <i>jsIs1073</i>              | (Zheng et al., 2014) |
| GN885              | <i>jsIs1073;him-4(e1267)</i> | this study           |
| GN886              | <i>jsIs1073;mec-1(e1066)</i> | this study           |
| GN887              | <i>jsIs1073;mec-1(e1738)</i> | this study           |
| GN906              | <i>jsIs1073;mec-5(u444)</i>  | this study           |

641

642

643

644

645

646

647

648

649 Figure S1: *him-4(e1267)* is likely to be a null allele. A) Map of *him-4* with *e1267* allele  
650 annotated. B) Close-up of insertion in sequence as indicated by dotted lines in Panel A. C)  
651 Sequences of both Indels found by sequencing. The first indel is likely to cause the null  
652 phenotype because it causes a frameshift in an early exon, whereas the second indel is in a later  
653 intron.

654

655 Figure S2: Quality control for image (z) stacks as a function of genotype. Eleven (11) image  
656 stacks were collected from each TRN analyzed for touch-induced strain. This plot shows the  
657 number of stacks that passed quality for each experiment. Note: The final stack was not used as  
658 it was acquired in the resting configuration and could not be compared to a subsequent stack  
659 collected in the indented configuration.

660

661 Figure S3: We tuned parameters of the particle tracking algorithm to account for variability  
662 across images.

663

664 **Table S1: Average number of detected mitochondria and distance between adjacent**  
 665 **detected mitochondria as a function of genotype.**

666

| <i>Number of mitochondria</i>                 |                                    |                                         |                                                       |                    |                    |
|-----------------------------------------------|------------------------------------|-----------------------------------------|-------------------------------------------------------|--------------------|--------------------|
| Genotype                                      | Mean number $\pm$ SEM              | Mean difference from control            | 95% confidence interval of mean difference            | Minimum            | Maximum            |
| Control                                       | 8.9 $\pm$ 0.6                      |                                         |                                                       | 5                  | 15                 |
| <i>him-4(e1267)</i>                           | 9.1 $\pm$ 0.5                      | 0.2                                     | (-1.5, 1.6)                                           | 6                  | 13                 |
| <i>mec-1(e1066)</i>                           | 8.8 $\pm$ 0.5                      | -0.1                                    | (-1.7, 1.5)                                           | 6                  | 13                 |
| <i>mec-1(e1738)</i>                           | 8.9 $\pm$ 0.5                      | 0.01                                    | (-1.6, 1.5)                                           | 6                  | 15                 |
| <i>mec-5(u444)</i>                            | 7.2 $\pm$ 0.5                      | -1.7                                    | (-3.3, -0.3)                                          | 5                  | 12                 |
| <i>Distance between adjacent mitochondria</i> |                                    |                                         |                                                       |                    |                    |
| Genotype                                      | Mean distance $\pm$ SEM ( $\mu$ m) | Mean difference from control ( $\mu$ m) | 95% confidence interval of mean difference ( $\mu$ m) | Minimum ( $\mu$ m) | Maximum ( $\mu$ m) |
| Control                                       | 26.0 $\pm$ 0.4                     |                                         |                                                       | 5.4                | 63.7               |
| <i>him-4(e1267)</i>                           | 27.3 $\pm$ 0.4                     | 1.4                                     | (-2.0, 4.8)                                           | 5.0                | 76.1               |
| <i>mec-1(e1066)</i>                           | 27.0 $\pm$ 0.5                     | 1.0                                     | (-2.6, 4.7)                                           | 5.3                | 65.1               |
| <i>mec-1(e1738)</i>                           | 26.9 $\pm$ 0.4                     | 0.9                                     | (-2.4, 4.3)                                           | 6.0                | 64.1               |
| <i>mec-5(u444)</i>                            | 31.1 $\pm$ 0.6                     | 5.2                                     | (1.2, 9.3)                                            | 5.5                | 84.1               |

667

668 The number of detected mitochondria and distance between adjacent mitochondria in the ALM  
 669 neurons was similar in control and the ECM mutants, except for *mec-5(u444)* which had fewer  
 670 detected mitochondria and larger distances between adjacent mitochondria, on average. Number  
 671 of animals is the same as Table 2.

672

673

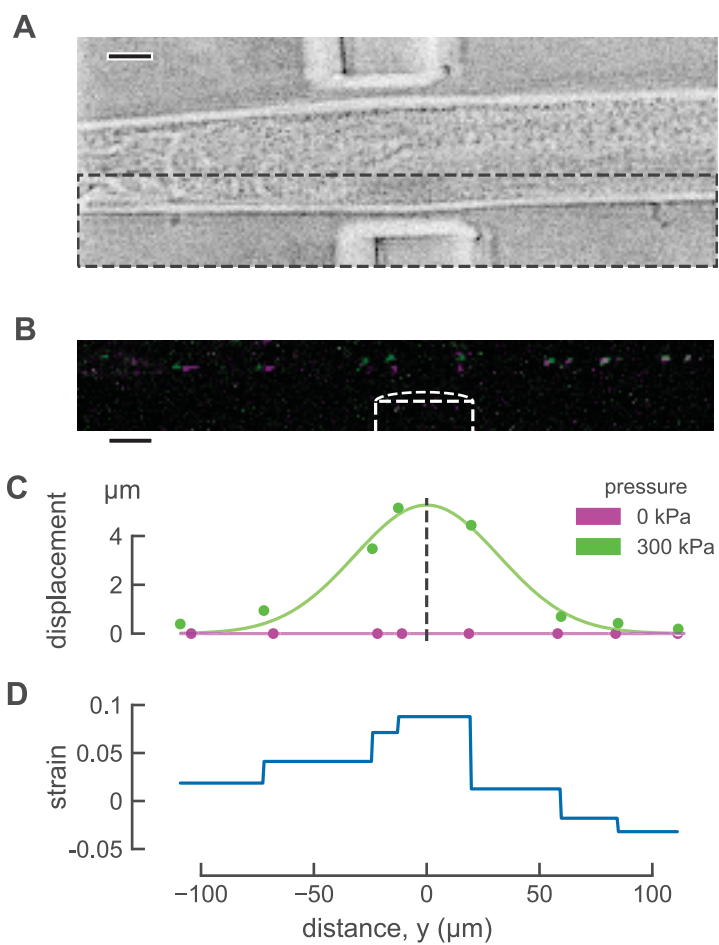



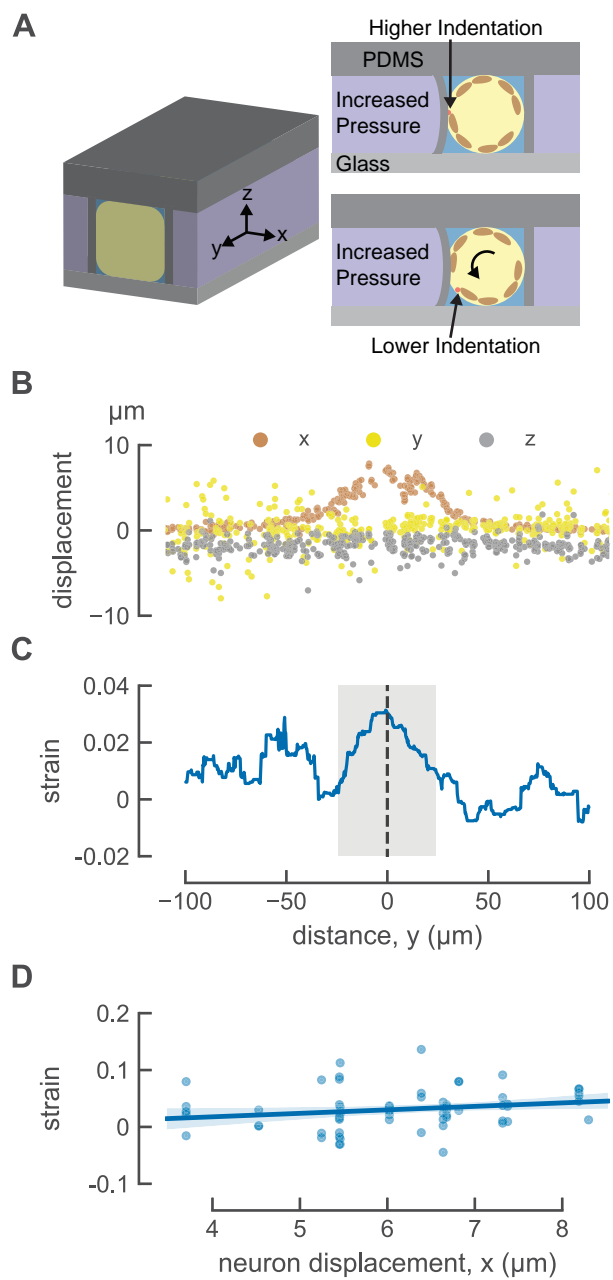

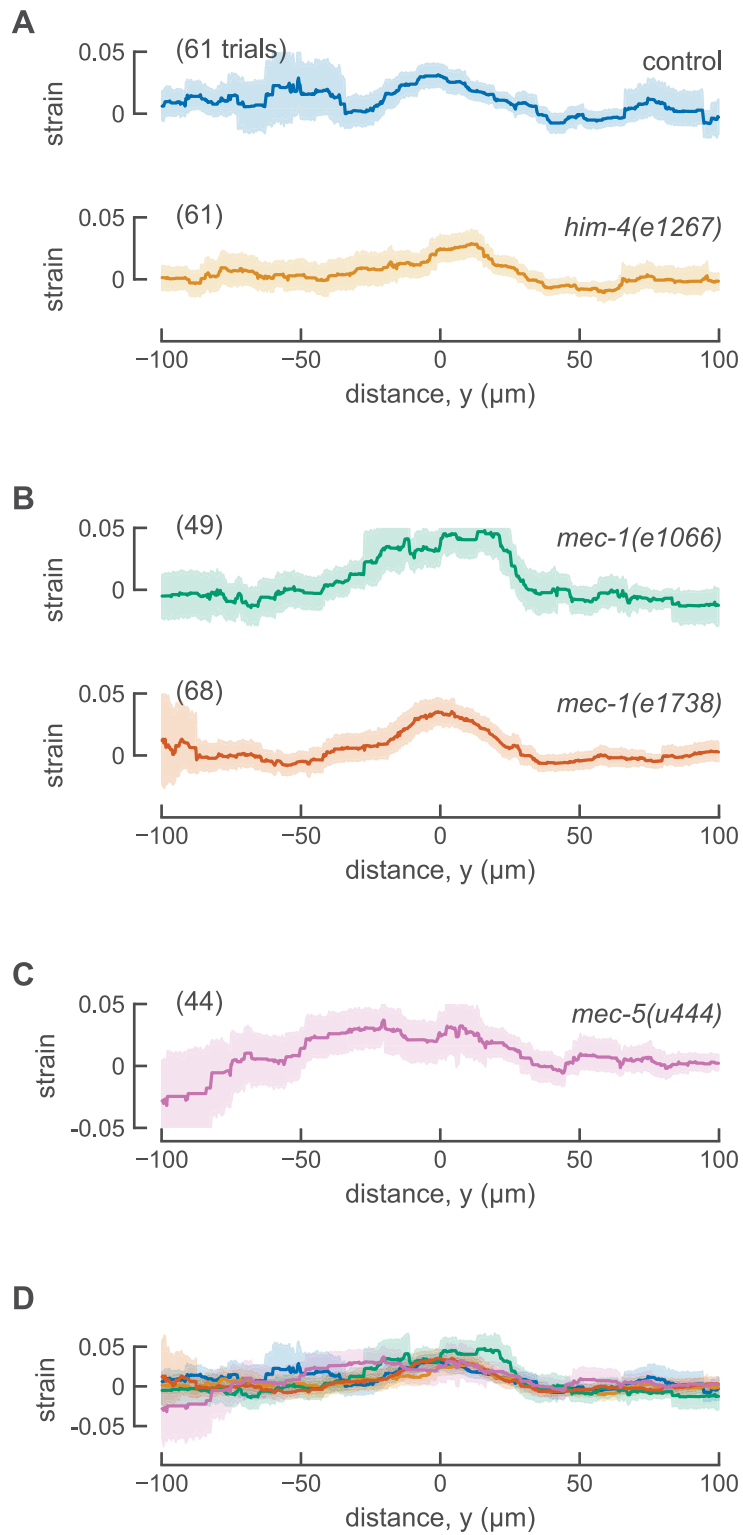

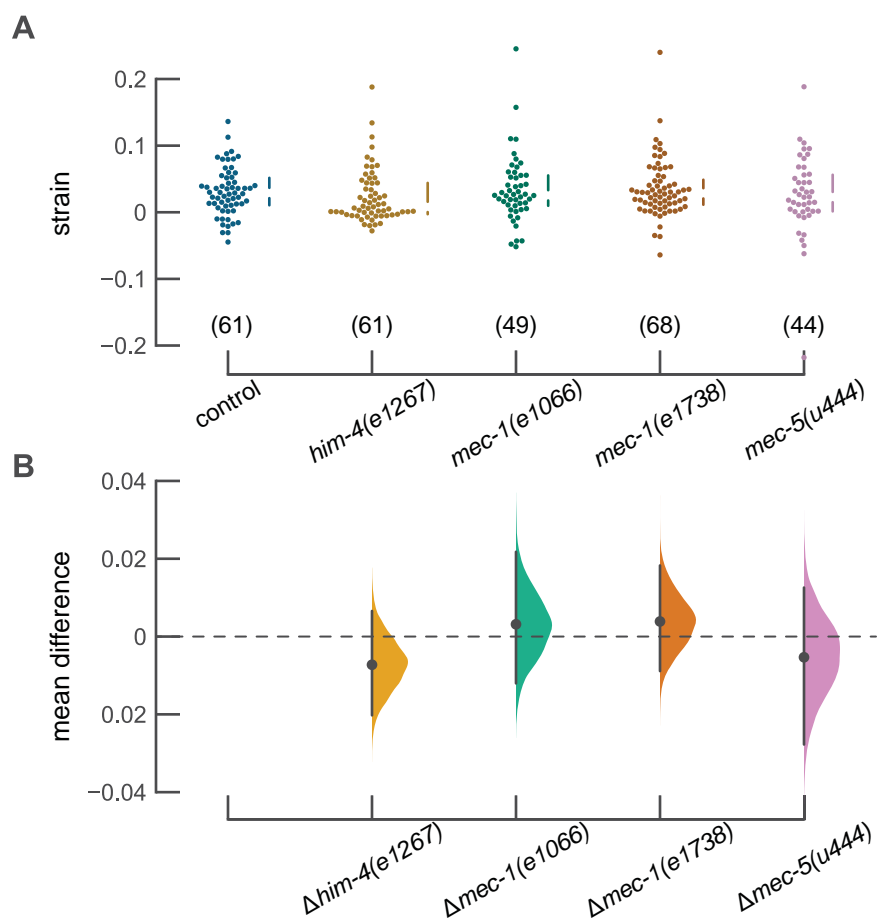

Source: https://www.biorxiv.org/content/biorxiv/early/2020/06/04/2019.12.27.889766.full.pdf
